# Supplementary material
Source: Springer Nature journal article supplement (https://www.springermedizin.de/resource/supplementary/12911_2011_447_MOESM3_ESM.pdf/9525766)
Supplement: MOESM3 [file 9525766]

|                                                                                                                                                                                                      |                                                                                                                                                                                                                                                                                                                                                                                    |                                                                                                                                                                                                           |                                                                                                                                                                                                     |                                                                                                                                                                           |                                                                                                                                                                                                                                                 |
|------------------------------------------------------------------------------------------------------------------------------------------------------------------------------------------------------|------------------------------------------------------------------------------------------------------------------------------------------------------------------------------------------------------------------------------------------------------------------------------------------------------------------------------------------------------------------------------------|-----------------------------------------------------------------------------------------------------------------------------------------------------------------------------------------------------------|-----------------------------------------------------------------------------------------------------------------------------------------------------------------------------------------------------|---------------------------------------------------------------------------------------------------------------------------------------------------------------------------|-------------------------------------------------------------------------------------------------------------------------------------------------------------------------------------------------------------------------------------------------|
| <p><b><u>Demographics</u></b><br/> Date of birth<br/> Gender<br/> Race/ethnicity<br/> – <i>Derived from EMR (except race and ethnicity which patient provides)</i><br/> – <i>Includes values</i></p> | <p><b><u>Diagnoses</u></b><br/> Colorectal cancer<br/> Breast cancer<br/> Cervical cancer<br/> Prostate cancer<br/> Coronary disease<br/> Heart failure<br/> Hypertension<br/> Hyperlipidemia<br/> Lung disease<br/> Asthma<br/> Diabetes<br/> Osteoporosis<br/> – <i>Derived from EMR</i><br/> – <i>Includes EMR modifiers (e.g, active, resolved problem) and onset date</i></p> | <p><b><u>Surgeries</u></b><br/> Hysterectomy<br/> – <i>Patient report</i><br/> – <i>Includes categorical value (e.g. had versus didn't have)</i></p>                                                      | <p><b><u>Family history</u></b><br/> Colorectal cancer<br/> Prostate cancer<br/> Heart disease<br/> – <i>Patient report</i><br/> – <i>Includes relation of person affected and age of onset</i></p> | <p><b><u>Health behaviors</u></b><br/> Diet<br/> Physical activity<br/> Smoking status<br/> – <i>Patient report</i><br/> – <i>Includes behavior and date reported</i></p> | <p><b><u>Medications</u></b><br/> Aspirin<br/> – <i>Derived from EMR</i><br/> – <i>Includes dose, date prescribed, and EMR modifiers (e.g. active or resolved medication)</i></p>                                                               |
| <p><b><u>Vital signs</u></b><br/> Height<br/> Weight<br/> Blood pressure<br/> – <i>Derived from EMR</i><br/> – <i>Includes date measured and value</i></p>                                           | <p><b><u>Immunizations</u></b><br/> Pneumococcal<br/> Influenza<br/> Tetanus<br/> – <i>Derived from EMR</i><br/> – <i>Includes date administered</i></p>                                                                                                                                                                                                                           | <p><b><u>Results</u></b><br/> Stool blood<br/> LDL<br/> HDL<br/> Plasma glucose<br/> Hemoglobin A1c<br/> PSA<br/> Pap smear<br/> – <i>Derived from EMR</i><br/> – <i>Includes test date and value</i></p> | <p><b><u>Radiology</u></b><br/> Mammogram<br/> Dexa scan<br/> Abdominal aortic aneurysm imaging (e.g., ultrasound, CT scan)<br/> – <i>Derived from EMR</i><br/> – <i>Includes test date</i></p>     | <p><b><u>Procedures</u></b><br/> Colonoscopy<br/> Sigmoidoscopy<br/> – <i>Derived from EMR</i><br/> – <i>Includes test date</i></p>                                       | <p><b><u>Abnormalities</u></b><br/> Colonoscopy<br/> Sigmoidoscopy<br/> Mammogram<br/> Dexa scan<br/> Abdominal aortic aneurysm imaging<br/> – <i>Patient report</i><br/> – <i>Includes categorical value (e.g. normal versus abnormal)</i></p> |
